# Supplementary material for: Adjunctive Cariprazine for the Treatment of Patients With Major Depressive Disorder: A Randomized, Double-Blind, Placebo-Controlled Phase 3 Study
Source: Atypon-hosted journal article supplement (doi:10.1176/appi.ajp.20220504), 2023-02-15
Supplement: appi.ajp.20220504.ds001.pdf [file appi.ajp.20220504.ds001.pdf]

## Supplemental Data

**Table S1. Participants Currently Taking ADTs for at Least 6 Weeks During the Current MDE (Safety Population)**

| Antidepressant Treatment     | Placebo<br>(N=253) |      | Cariprazine 1.5 mg/d<br>(N=252) |      | Cariprazine 3.0 mg/d<br>(N=252) |      |
|------------------------------|--------------------|------|---------------------------------|------|---------------------------------|------|
|                              | N                  | %    | N                               | %    | N                               | %    |
| Clomipramine                 |                    |      |                                 |      |                                 |      |
| At minimum dosage or above   | 3                  | 1.2  | 1                               | 0.4  | 1                               | 0.4  |
| Dose escalated at least once | 2                  | 0.8  | 1                               | 0.4  | 1                               | 0.4  |
| Vortioxetine                 |                    |      |                                 |      |                                 |      |
| At minimum dosage or above   | 5                  | 2.0  | 8                               | 3.2  | 11                              | 4.4  |
| Dose escalated at least once | 5                  | 2.0  | 5                               | 2.0  | 10                              | 4.0  |
| Citalopram                   |                    |      |                                 |      |                                 |      |
| At minimum dosage or above   | 18                 | 7.1  | 12                              | 4.8  | 19                              | 7.5  |
| Dose escalated at least once | 16                 | 6.3  | 12                              | 4.8  | 19                              | 7.5  |
| Duloxetine                   |                    |      |                                 |      |                                 |      |
| At minimum dosage or above   | 25                 | 9.9  | 29                              | 11.5 | 28                              | 11.1 |
| Dose escalated at least once | 23                 | 9.1  | 28                              | 11.1 | 26                              | 10.3 |
| Trazodone                    |                    |      |                                 |      |                                 |      |
| At minimum dosage or above   | 3                  | 1.2  | 4                               | 1.6  | 4                               | 1.6  |
| Dose escalated at least once | 3                  | 1.2  | 3                               | 1.2  | 2                               | 0.8  |
| Venlafaxine                  |                    |      |                                 |      |                                 |      |
| At minimum dosage or above   | 29                 | 11.5 | 43                              | 17.1 | 28                              | 11.1 |
| Dose escalated at least once | 29                 | 11.5 | 39                              | 15.5 | 26                              | 10.3 |
| Amitriptyline                |                    |      |                                 |      |                                 |      |
| At minimum dosage or above   | 5                  | 2.0  | 4                               | 1.6  | 1                               | 0.4  |
| Dose escalated at least once | 5                  | 2.0  | 4                               | 1.6  | 1                               | 0.4  |
| Escitalopram                 |                    |      |                                 |      |                                 |      |
| At minimum dosage or above   | 58                 | 22.9 | 53                              | 21.0 | 55                              | 21.8 |
| Dose escalated at least once | 55                 | 21.7 | 51                              | 20.2 | 50                              | 19.8 |
| Desipramine                  |                    |      |                                 |      |                                 |      |
| At minimum dosage or above   | 1                  | 0.4  | 0                               | 0.0  | 0                               | 0.0  |
| Dose escalated at least once | 1                  | 0.4  | 0                               | 0.0  | 0                               | 0.0  |
| Mianserin                    |                    |      |                                 |      |                                 |      |
| At minimum dosage or above   | 4                  | 1.6  | 4                               | 1.6  | 4                               | 1.6  |
| Dose escalated at least once | 4                  | 1.6  | 4                               | 1.6  | 4                               | 1.6  |
| Paroxetine                   |                    |      |                                 |      |                                 |      |
| At minimum dosage or above   | 17                 | 6.7  | 19                              | 7.5  | 19                              | 7.5  |
| Dose escalated at least once | 17                 | 6.7  | 18                              | 7.1  | 17                              | 6.7  |
| Desvenlafaxine               |                    |      |                                 |      |                                 |      |
| At minimum dosage or above   | 1                  | 0.4  | 2                               | 0.8  | 3                               | 1.2  |
| Dose escalated at least once | 1                  | 0.4  | 2                               | 0.8  | 3                               | 1.2  |
| Fluoxetine                   |                    |      |                                 |      |                                 |      |
| At minimum dosage or above   | 24                 | 9.5  | 27                              | 10.7 | 25                              | 9.9  |
| Dose escalated at least once | 23                 | 9.1  | 25                              | 9.9  | 24                              | 9.5  |
| Mirtazapine                  |                    |      |                                 |      |                                 |      |
| At minimum dosage or above   | 10                 | 4.0  | 16                              | 6.3  | 7                               | 2.8  |
| Dose escalated at least once | 9                  | 3.6  | 13                              | 5.2  | 7                               | 2.8  |
| Doxepin                      |                    |      |                                 |      |                                 |      |
| At minimum dosage or above   | 1                  | 0.4  | 0                               | 0.0  | 0                               | 0.0  |

|                              |    |      |    |      |    |      |
|------------------------------|----|------|----|------|----|------|
| Dose escalated at least once | 1  | 0.4  | 0  | 0.0  | 0  | 0.0  |
| Trimipramine                 |    |      |    |      |    |      |
| At minimum dosage or above   | 0  | 0.0  | 0  | 0.0  | 1  | 0.4  |
| Dose escalated at least once | 0  | 0.0  | 0  | 0.0  | 1  | 0.4  |
| Imipramine                   |    |      |    |      |    |      |
| At minimum dosage or above   | 1  | 0.4  | 0  | 0.0  | 0  | 0.0  |
| Dose escalated at least once | 1  | 0.4  | 0  | 0.0  | 0  | 0.0  |
| Agomelatine                  |    |      |    |      |    |      |
| At minimum dosage or above   | 6  | 2.4  | 1  | 0.4  | 6  | 2.4  |
| Dose escalated at least once | 6  | 2.4  | 0  | 0.0  | 6  | 2.4  |
| Vilazodone                   |    |      |    |      |    |      |
| At minimum dosage or above   | 3  | 1.2  | 4  | 1.6  | 3  | 1.2  |
| Dose escalated at least once | 3  | 1.2  | 3  | 1.2  | 3  | 1.2  |
| Bupropion                    |    |      |    |      |    |      |
| At minimum dosage or above   | 22 | 8.7  | 17 | 6.7  | 17 | 6.7  |
| Dose escalated at least once | 21 | 8.3  | 16 | 6.3  | 16 | 6.3  |
| Sertraline                   |    |      |    |      |    |      |
| At minimum dosage or above   | 53 | 20.9 | 43 | 17.1 | 52 | 20.6 |
| Dose escalated at least once | 49 | 19.4 | 40 | 15.9 | 50 | 19.8 |

---

Based on Antidepressant Treatment Response Questionnaire (ATRQ).

**Table S2.** Participants (n, %) With Treatment-Emergent Significant Changes in Lipids and Glucose During the Double-Blind Treatment Phase (Safety Population)

| Clinical Laboratory Parameter                               | Baseline (mg/dL) | Postbaseline (mg/dL) | Placebo (N=253) |      | Cariprazine 1.5 mg/d (N=252) |      | Cariprazine 3.0 mg/d (N=252) |      |
|-------------------------------------------------------------|------------------|----------------------|-----------------|------|------------------------------|------|------------------------------|------|
|                                                             |                  |                      | n/N1            | (%)  | n/N1                         | %    | n/N1                         | %    |
| <b>Cholesterol, total</b>                                   |                  |                      |                 |      |                              |      |                              |      |
| Normal to high                                              | <200             | ≥240                 | 1/93            | 1.1  | 0/121                        | —    | 2/114                        | 1.8  |
| Borderline to high                                          | ≥200 and <240    | ≥240                 | 12/74           | 16.2 | 8/77                         | 10.4 | 7/75                         | 9.3  |
| Normal/borderline to high                                   | <240             | ≥240                 | 13/167          | 7.8  | 8/198                        | 4.0  | 9/189                        | 4.8  |
| Normal to borderline/high                                   | <200             | ≥200                 | 18/93           | 19.4 | 19/121                       | 15.7 | 14/114                       | 12.3 |
| <b>Combined LDL direct and calculated, fasting</b>          |                  |                      |                 |      |                              |      |                              |      |
| Normal to high                                              | <100             | ≥160                 | 0/46            | —    | 0/66                         | —    | 0/60                         | —    |
| Borderline to high                                          | ≥100 and <160    | ≥160                 | 14/115          | 12.2 | 10/117                       | 8.5  | 7/104                        | 6.7  |
| Normal/borderline to high                                   | <160             | ≥160                 | 14/161          | 8.7  | 10/183                       | 5.5  | 7/164                        | 4.3  |
| Normal to borderline/high                                   | <100             | ≥100                 | 11/46           | 23.9 | 6/66                         | 9.1  | 7/60                         | 11.7 |
| <b>Cholesterol HDL</b>                                      |                  |                      |                 |      |                              |      |                              |      |
| Normal to low                                               | ≥40              | <40                  | 9/192           | 4.7  | 7/204                        | 3.4  | 14/214                       | 6.5  |
| <b>Triglycerides, fasting</b>                               |                  |                      |                 |      |                              |      |                              |      |
| Normal to high                                              | <150             | ≥200                 | 9/135           | 6.7  | 10/148                       | 6.8  | 8/148                        | 5.4  |
| Normal to very high                                         | <150             | ≥500                 | 0/135           | —    | 0/148                        | —    | 0/148                        | —    |
| Borderline to high                                          | ≥150 and <200    | ≥200                 | 11/36           | 30.6 | 9/29                         | 31.0 | 3/21                         | 14.3 |
| Borderline to very high                                     | ≥150 and <200    | ≥500                 | 0/36            | —    | 0/29                         | —    | 0/21                         | —    |
| Normal/borderline to high                                   | <200             | ≥200                 | 20/171          | 11.7 | 19/177                       | 10.7 | 11/169                       | 6.5  |
| Normal/borderline to very high                              | <200             | ≥500                 | 0/171           | —    | 0/177                        | —    | 0/169                        | —    |
| Normal to borderline/high/very high                         | <150             | ≥150                 | 26/135          | 19.3 | 22/148                       | 14.9 | 26/148                       | 17.6 |
| <b>Treatment-emergent triglycerides</b>                     |                  |                      |                 |      |                              |      |                              |      |
| Treatment-emergent very high, fasting                       | <500             | ≥500                 | 1/205           | 0.5  | 0/205                        | —    | 2/201                        | 1.0  |
| Treatment-emergent very high, nonfasting and random         | <500             | ≥500                 | 0/8             | —    | 0/6                          | —    | 1/12                         | 8.3  |
| Treatment-emergent >1000 mg/dL (all cases)                  | <1000            | ≥1000                | 0/213           | —    | 0/212                        | —    | 0/215                        | —    |
| <b>Change in cholesterol</b>                                |                  |                      |                 |      |                              |      |                              |      |
| Change in fasting or nonfasting total cholesterol ≥40 mg/dL | Any value        | Increase ≥40         | 10/231          | 4.3  | 9/235                        | 3.8  | 13/237                       | 5.5  |
| Change in fasting LDL cholesterol ≥30 mg/dL                 | Any value        | Increase ≥30         | 13/204          | 6.4  | 12/207                       | 5.8  | 11/200                       | 5.5  |
| Change in fasting or nonfasting HDL cholesterol ≥20 mg/dL   | Any value        | Decrease ≥20         | 6/231           | 2.6  | 7/235                        | 3.0  | 4/236                        | 1.7  |
| Change in fasting triglycerides ≥50 mg/dL                   | Any value        | Increase ≥50         | 32/205          | 15.6 | 30/206                       | 14.6 | 33/203                       | 16.3 |

N=total number of participants in the Safety Population; N1=number of participants with baseline meeting the baseline criteria and with at least one nonmissing postbaseline value during the double-blind treatment period; n=number of patients who met the criterion; HDL=high-density lipoprotein; LDL=low-density lipoprotein.
